# Supplementary material for: Modeling and Optimization of Phenolic Compounds from Sage (Salvia fruticosa L.) Post-Distillation Residues: Ultrasound- versus Microwave-Assisted Extraction
Source: MDPI journal article supplement (doi:10.3390/antiox12030549), 2023-02-21
Supplement: s1 [file s1]

# SUPPLEMENTARY DATA

**Table S1.** Analysis of variance for response surface models for the microwave-assisted extraction and ultrasound-assisted extraction, showing linear, quadratic and interaction relations of each variable and coefficients.

| Coefficients                           | EY       | TPC       | TFC       | RMA      | CARO     | CARA     | ABTS      | DPPH      |
|----------------------------------------|----------|-----------|-----------|----------|----------|----------|-----------|-----------|
| <b>Microwave-assisted extraction</b>   |          |           |           |          |          |          |           |           |
| <b>Intercept, <math>\beta_0</math></b> | 19.33    | 179.36    | 244.58    | 67.37    | 46.67    | 134.53   | 308.90    | 208.83    |
| <b>Linear</b>                          |          |           |           |          |          |          |           |           |
| $\beta_1$                              | -2.22*** | 20.01***  | 17.66***  | 5.37***  | 9.64***  | 77.30*** | 34.24***  | 24.28***  |
| $\beta_2$                              | 0.96     | -0.14     | 2.54      | 0.69     | -0.16    | 0.35     | 12.09*    | 2.37      |
| $\beta_3$                              | 0.65     | -1.63     | -6.39     | -3.26**  | -9.62*** | -13.53*  | -8.13     | -3.33     |
| $\beta_4$                              | 2.27***  | 5.93*     | -4.57     | 1.48     | 2.79     | -0.92    | -7.99     | -3.79     |
| <b>Quadratic</b>                       |          |           |           |          |          |          |           |           |
| $\beta_1^2$                            | 0.63     | -9.42*    | -0.43     | 0.01     | -12.28** | 15.80    | -17.83*   | -36.52*** |
| $\beta_2^2$                            | 2.20**   | -1.20     | 2.72      | 2.27     | -1.98    | 13.55    | 6.60      | -3.00     |
| $\beta_3^2$                            | 1.57*    | 5.79      | 3.88      | 1.57     | -5.30    | 8.11     | -7.38     | -17.76*** |
| $\beta_4^2$                            | -0.30    | -0.28     | 4.41      | -0.17    | -3.88    | 23.56**  | -6.75     | -4.78     |
| <b>Interaction</b>                     |          |           |           |          |          |          |           |           |
| $\beta_{12}$                           | -0.86    | 0.28      | 7.39      | 3.30*    | -2.18    | 7.50     | 3.15      | 4.12      |
| $\beta_{13}$                           | 0.51     | -5.13     | -2.82     | -1.00    | -1.58    | 4.51     | -6.93     | -2.45     |
| $\beta_{14}$                           | 0.61     | 2.90      | -0.68     | 1.55     | 1.72     | -6.45    | -2.90     | -3.43     |
| $\beta_{23}$                           | -0.25    | -1.77     | -6.08     | 0.80     | -3.48    | -11.26   | -0.70     | 4.13      |
| $\beta_{24}$                           | 1.03     | 3.82      | 6.06      | 0.03     | 1.42     | -0.30    | 5.62      | -9.10     |
| $\beta_{34}$                           | -0.12    | -3.46     | 0.95      | -0.18    | -1.72    | 9.83     | 10.90     | -8.40     |
| Mean                                   | 21.15    | 177.09    | 249.28    | 69.00    | 36.26    | 161.65   | 297.63    | 253.25    |
| C.V. (%)                               | 7.69     | 5.09      | 4.70      | 4.36     | 20.61    | 10.88    | 5.18      | 3.44      |
| R <sup>2</sup>                         | 0.85     | 0.87      | 0.76      | 0.85     | 0.83     | 0.96     | 0.88      | 0.95      |
| R <sup>2</sup> (adj)                   | 0.69     | 0.72      | 0.49      | 0.67     | 0.63     | 0.90     | 0.74      | 0.89      |
| F-value (model)                        | 5.05*    | 5.69**    | 2.75*     | 4.80**   | 4.20**   | 18.18*** | 6.34***   | 15.60***  |
| F-value (Lack-of-fit)                  | 2.73     | 10.88     | 14.29     | 2.23     | 15.52    | 2.19     | 5.38      | 3.37      |
| <b>Ultrasound-assisted extraction</b>  |          |           |           |          |          |          |           |           |
| <b>Intercept, <math>\beta_0</math></b> | 20.93    | 177.90    | 235.71    | 72.35    | 43.59    | 78.95    | 321.63    | 293.66    |
| <b>Linear</b>                          |          |           |           |          |          |          |           |           |
| $\beta_1$                              | -1.62*** | 13.57***  | 11.80***  | 6.90***  | 14.24*** | -11.61   | 31.82***  | 26.92***  |
| $\beta_2$                              | 1.19***  | -1.54     | 1.07      | 3.92***  | 1.99*    | 3.44     | 3.21      | 0.38      |
| $\beta_3$                              | 0.83**   | 4.05*     | 5.64*     | 1.79*    | -2.66**  | 4.97     | 13.03***  | 11.51***  |
| $\beta_4$                              | 0.41     | -5.09**   | -8.53**   | 1.48     | -0.85    | -12.71   | -7.75*    | -14.31*** |
| <b>Quadratic</b>                       |          |           |           |          |          |          |           |           |
| $\beta_1^2$                            | 0.36     | -19.05*** | -24.14*** | -0.52    | -7.53*** | 13.37    | -26.15*** | -24.48*** |
| $\beta_2^2$                            | 1.12**   | 6.31*     | 16.18***  | 0.23     | 1.03     | -12.58   | 25.11***  | 8.49**    |
| $\beta_3^2$                            | 0.36     | -0.64     | -0.57     | -6.63*** | -1.30    | -10.75   | 3.09      | -2.07     |
| $\beta_4^2$                            | -0.25    | 0.93      | 4.08      | -0.67    | 2.57*    | 8.90     | 4.30      | -1.29     |
| <b>Interaction</b>                     |          |           |           |          |          |          |           |           |
| $\beta_{12}$                           | 0.03     | 1.34      | 4.12      | 0.13     | 1.07     | 17.69    | -4.50     | -1.58     |
| $\beta_{13}$                           | -0.20    | -0.47     | -3.02     | 1.59     | -1.08    | -13.81   | -6.95     | 1.38      |
| $\beta_{14}$                           | -0.33    | -15.10*** | -8.05     | 2.62     | -0.94    | -8.48    | -20.10**  | -22.27*** |
| $\beta_{23}$                           | 0.30     | 0.02      | 0.06      | -2.71    | -0.41    | 9.06     | 7.25      | -2.30     |
| $\beta_{24}$                           | 0.30     | -3.87     | -2.07     | 0.45     | 0.70     | -40.37*  | -4.33     | 0.04      |
| $\beta_{34}$                           | 0.30     | -8.74**   | -10.15*   | 2.80     | -0.37    | 13.13    | -20.12**  | -8.19*    |
| Mean                                   | 21.64    | 172.37    | 233.73    | 68.98    | 41.26    | 78.48    | 324.46    | 285.06    |
| C.V. (%)                               | 3.81     | 3.04      | 3.34      | 4.04     | 6.04     | 8.07     | 3.13      | 2.17      |
| R <sup>2</sup>                         | 0.89     | 0.95      | 0.94      | 0.93     | 0.98     | 0.95     | 0.96      | 0.98      |
| R <sup>2</sup> (adj)                   | 0.77     | 0.90      | 0.86      | 0.84     | 0.95     | 0.90     | 0.91      | 0.95      |
| F-value (model)                        | 7.34**   | 18.38***  | 12.39***  | 11.04*** | 35.50*** | 5.77**   | 20.50***  | 37.23***  |
| F-value (Lack-of-fit)                  | 8.52     | 2.39      | 3.72      | 1.82     | 4.34     | 8.70     | 3.05      | 2.50      |

Effects are statistically significant at  $p \leq 0.05$  or  $p^{**} \leq 0.01$  or  $p^{***} \leq 0.001$ . (Abbreviations:  $\beta_1$ , ethanol concentration;  $\beta_2$ , time extraction;  $\beta_3$ , temperature extraction;  $\beta_4$ , solvent-to-solid ratio; EY, extraction yield; TPC, total phenolic content (mg GAE/g); TFC, total flavonoid content (mg CATE/g); RMA, rosmarinic acid (mg/g); CARO, carnosol (mg/g); CARA, carnosic acid (mg/g); ABTS, ABTS radical scavenging activity (mg TE/g); DPPH, DPPH radical scavenging activity (mg TE/g))

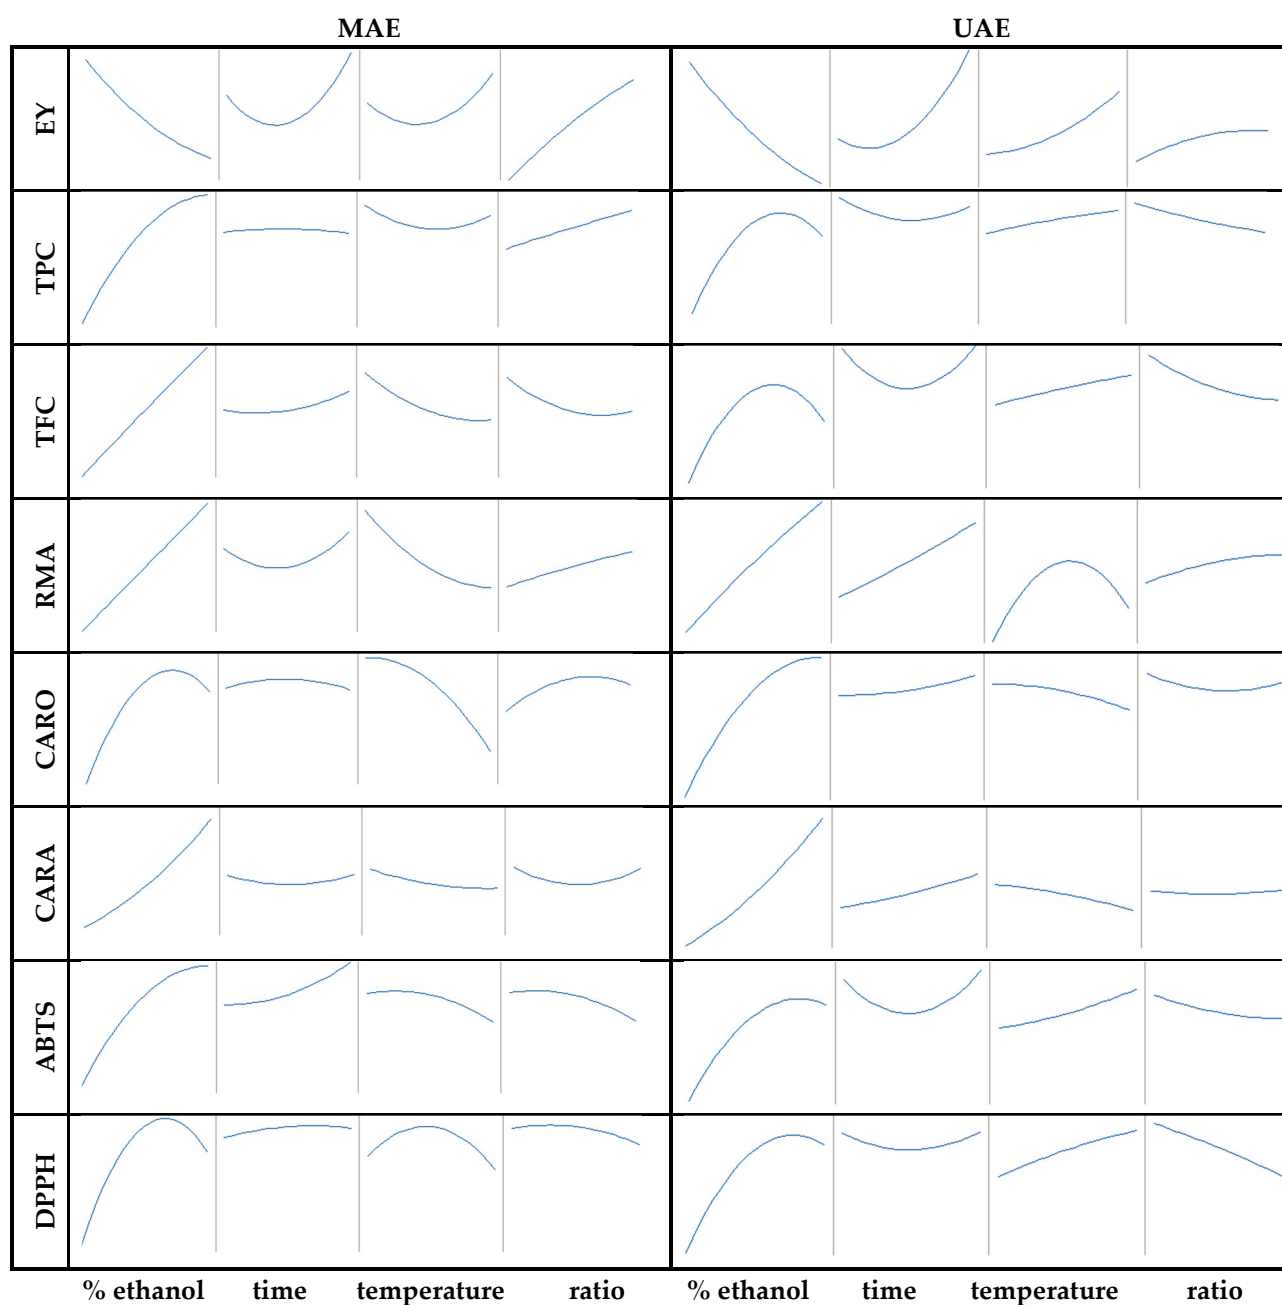

**Figure S1.** Main effects of the MAE and UAE parameters (% ethanol, time and temperature extraction as well as solvent/solid ratio) for extraction yield (EY), total phenolic content (TPC), total flavonoid content (TFC), rosmarinic acid (RMA), carnosol (CARO), carnosic acid (CARA), ABTS and DPPH radical scavenging activity.

## Extraction Yield

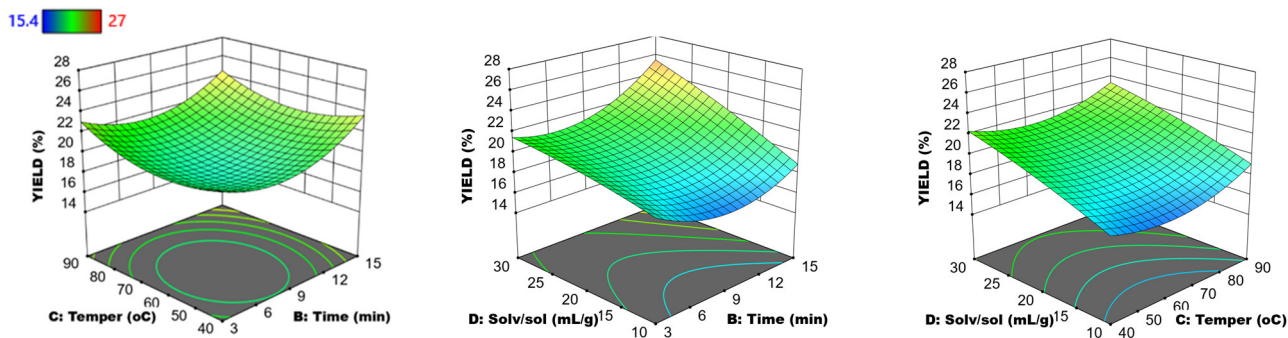

## Total Phenolic Content

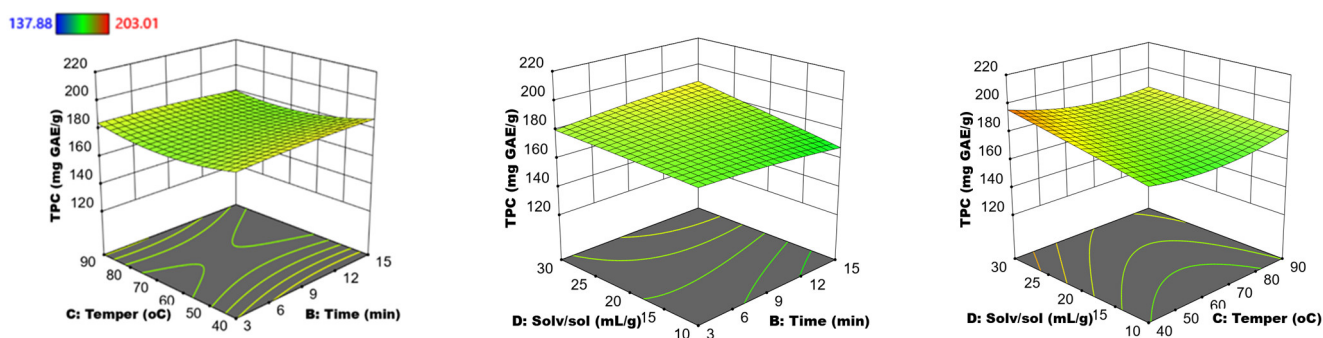

## ABTS Radical Scavenging Activity

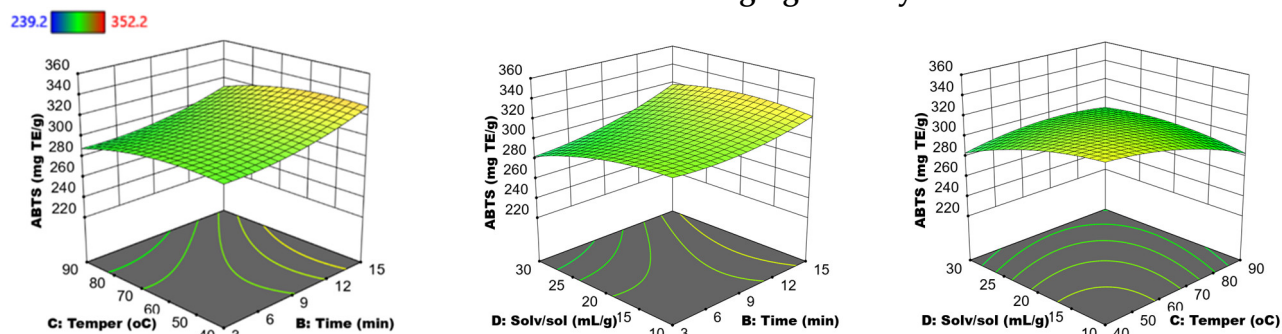

## DPPH Radical Scavenging Activity

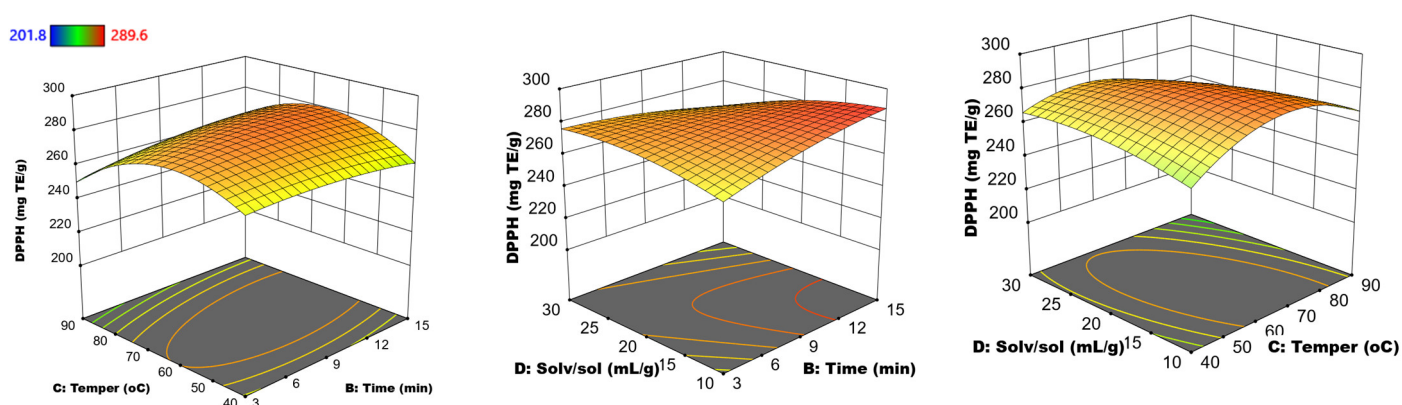

**Figure S2.** Response surface plots showing combined effects of the MAE parameters (time-temperature, time-solvent/solid, temperature-solvent/solid) for extraction yield (EY), total phenolic content (TPC), ABTS and DPPH radical scavenging activity, by keeping the two independent variables constant at medium levels.

## Rosmarinic Acid

59.3 79.8

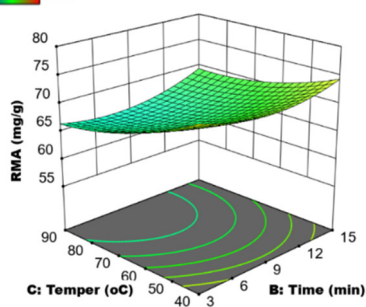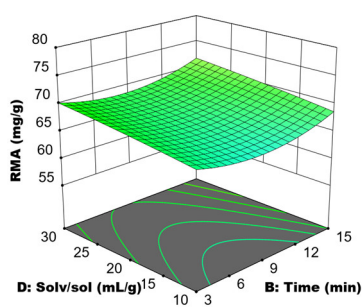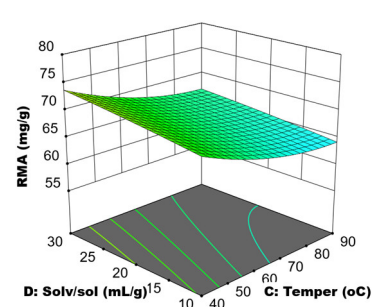

## Carnosol

13.9766 57.2997

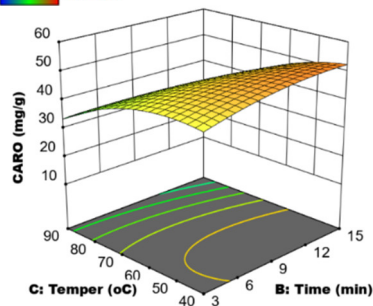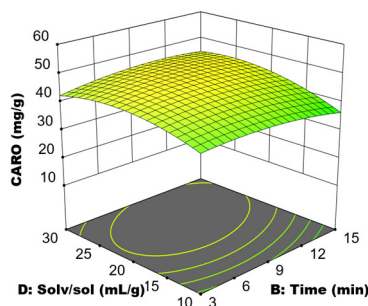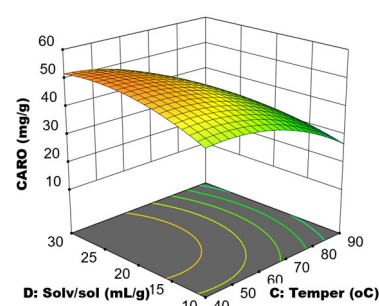

## Carnosic Acid

68.2927 265.216

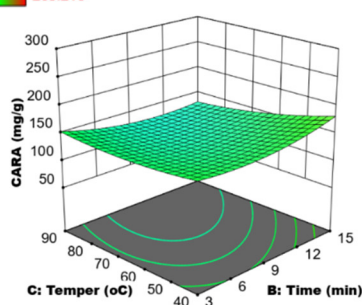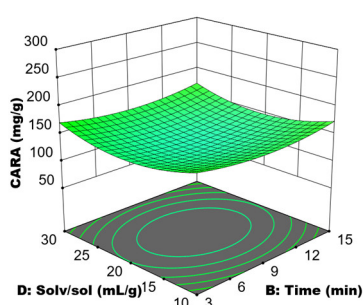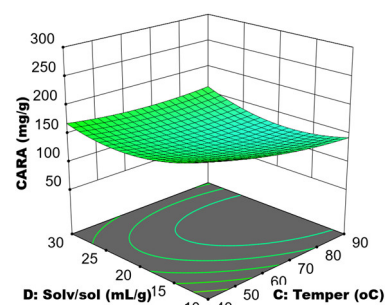

**Figure S3.** Response surface plots showing combined effects of the MAE parameters time-temperature, time-solvent/solid, temperature-solvent/solid) for rosmarinic acid (RMA), carnosol (CARO) and carnosic acid (CARA), by keeping the two independent variables constant at medium levels.



### Extraction Yield

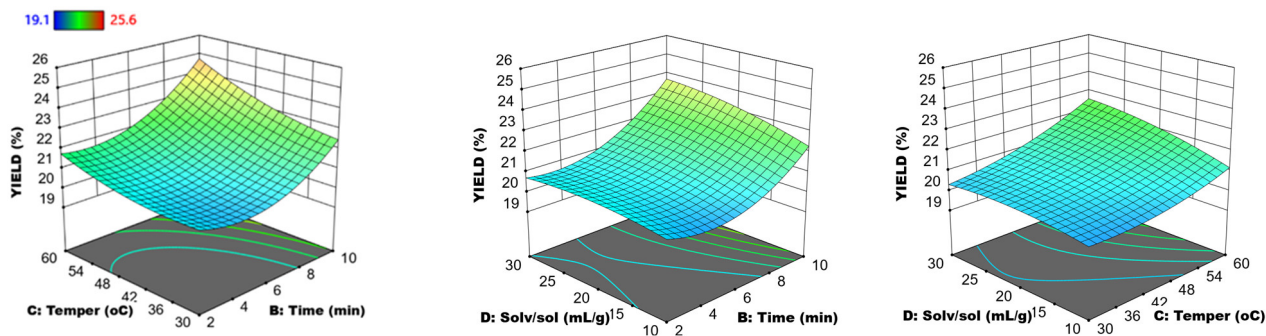

### Total Phenolic Content

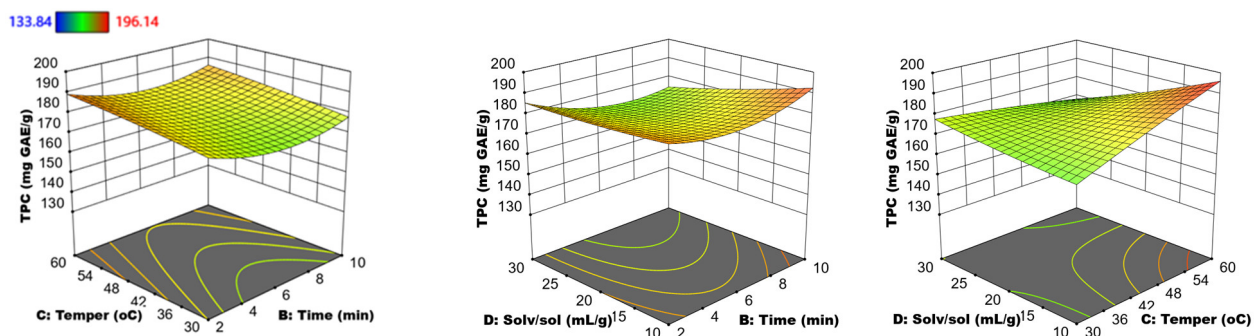

### ABTS Radical Scavenging Activity

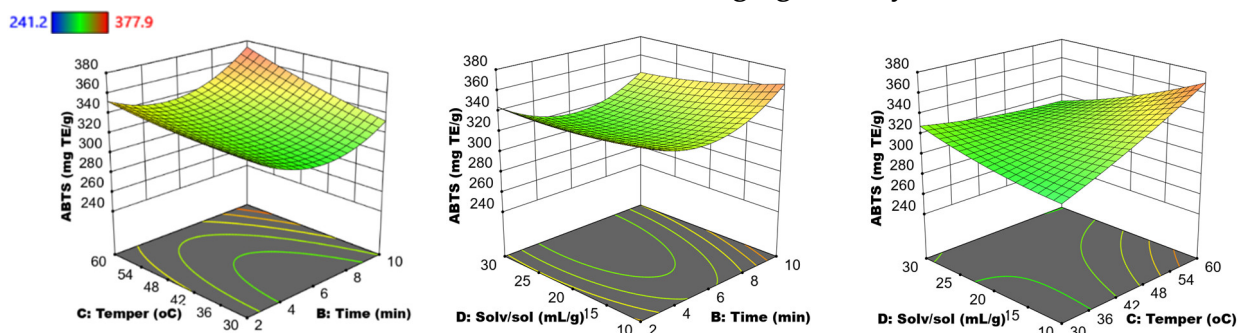

### DPPH Radical Scavenging Activity

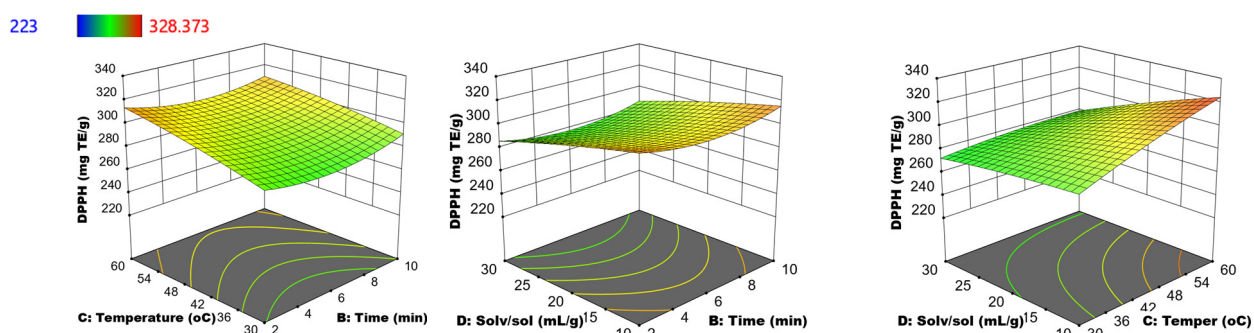

**Figure S4.** Response surface plots showing combined effects of the UAE parameters (time-temperature, time-solvent/solid, temperature-solvent/solid) for extraction yield (EY), total phenolic content (TPC), ABTS and DPPH radical scavenging activity, by keeping the two independent variables constant at medium levels.

## Rosmarinic Acid

58.128 84.72

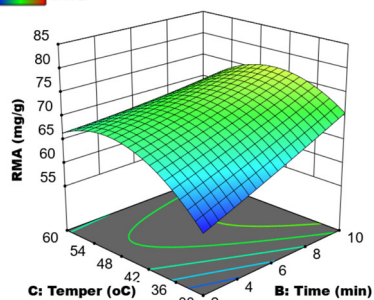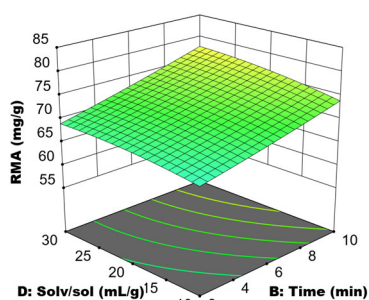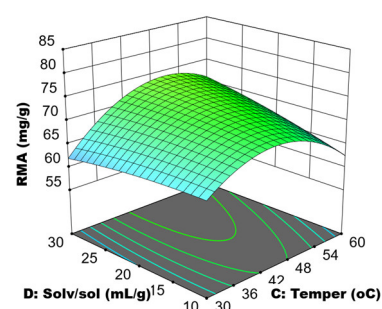

## Carnosol

20.0074 54.2228

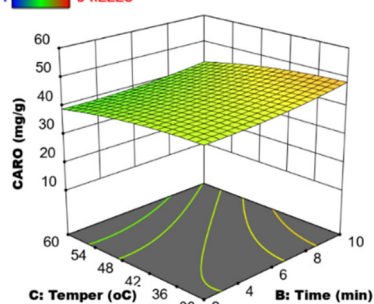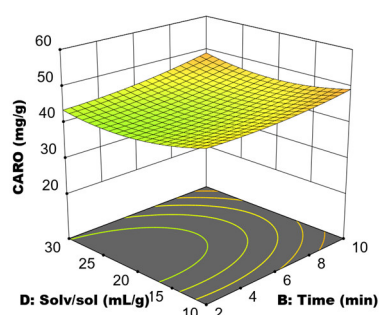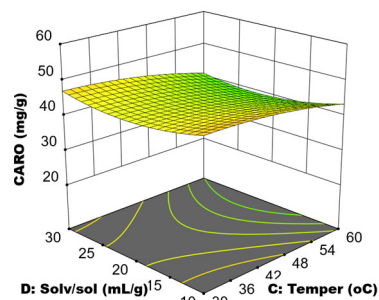

## Carnosic Acid

12.6829 155.12

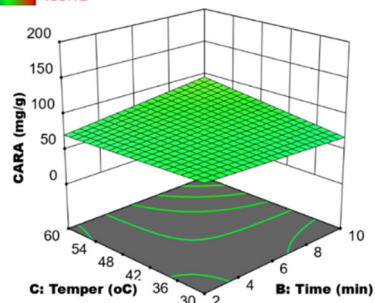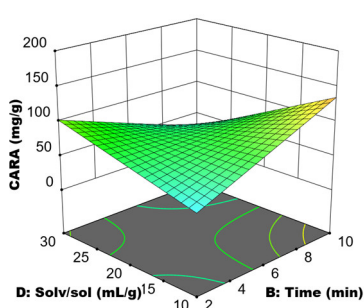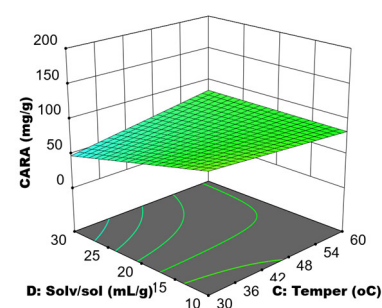

**Figure S5.** Response surface plots showing combined effects of the UAE parameters time-temperature, time-solvent/solid, temperature-solvent/solid) for rosmarinic acid (RMA), carnosol (CARO) and carnosic acid (CARA), by keeping the two independent variables constant at medium levels.
